# Supplementary material for: Chemo- and regioselective crossed alkyne cyclotrimerisation of 1,6-diynes with terminal monoalkynes mediated by Grubbs’ catalyst or Wilkinson’s catalyst
Source: Royal Society of Chemistry journal article supplement (doi:10.1039/b005636g), 2000-01-01
Supplement: b005636g.doc [file b005636g.doc]

**Supplementary Information**

**Chemo- and regioselective crossed alkyne cyclotrimerisation of 1,6- diynes with terminal monoalkynes catalysed by the Grubbs- and Wilkinson-complex.**

Bernhard Witulski,* Thomas Stengel and Jesús M. Fernández-Hernández

*Fachbereich Chemie, Universität Kaiserslautern, Erwin Schrödinger Straße, D-67663*

*Kaiserslautern, Germany. E-mail: Witulski@rhrk.uni-kl.de*

**General**. All reactions were carried out under a dry N2 atmosphere. Unless otherwise noted, materials were obtained from commercial suppliers and used without further purification. CH2Cl2 was destilled from P2O5 under N2, toluene was destilled from sodium/potassium under N2. 1H and 13C NMR spectra were recorded in CDCl3 using TMS as internal standard.

**Typical procedure for the cyclotrimerisation of diynes 1 or 4 and the monoalkynes 2 with the Wilkinson-complex.** [RhCl(PPh3)3] (13 mg, 0.014 mmol) was added to a solution of **4a** (72 mg, 0.276 mmol) and 2-propyne-1-ol **2c** (79 mg, 1.41 mmol) in dry toluene (20 ml) at room temperature. After stirring for 7 h at room temperature, the solvent was evaporated and the resulting crude product purified by column chromatography (silica gel, hexanes:diethyl ether = 1:1 (v/v)) to afford indolines *ortho*-**5a** and *meta*-**5a** (59 mg, 0.186 mmol, 67%) as a colourless powder. Thereafter the regioisomeres were separated by flash column chromatography (silica gel, hexanes:diethyl ether = 8:2 (v/v)).

**Typical procedure for the cyclotrimerisation of the diynes 1 or 4 and the monoalkynes 2 with the Grubbs-complex.** [RuCl2(=CHPh)(PCy3)2] (11 mg, 0.013 mmol) was added to a solution of **4a** (69 mg, 0.264 mmol) and 2-propyne-1-ol **2c** (81 mg, 1.45 mmol) in dry CH2Cl2 (20 ml) at room temperature. After stirring for 6 h at 40 °C, the solvent was evaporated and the resulting crude product purified by column chromatography (silica gel, hexanes:diethyl ether = 1:1 (v/v)) to afford indolines *ortho*-**5a** and *meta*-**5a** (59 mg, 0.186 mmol, 70%) as a colourless powder. Thereafter the regioisomeres were separated by flash column chromatography (silica gel, hexanes:diethyl ether = 8:2 (v/v)).

**Analytical data for *ortho***-**3a:** colourless powder; mp 162-163 °C; Rf = 0.45 (hexanes:AcOEt = 8:2); 1H-NMR (400 MHz; CDCl3)  7.80 (m, *J* = 8.4 Hz, *J* = 1.8 Hz, 2 H), 7.22 - 7.41 (m, 7 H), 7.14 (d, *J* = 7.9 Hz, 1 H), 7.04 (d, *J* = 7.9 Hz, 1 H), 4.69 (s, 2 H), 4.61 (s, 2 H), 2.42 (s, 3 H), 2.10 (s, 3 H); 13C**-**NMR (100 MHz; CDCl3)  143.6 (s), 141.5 (s), 140.9 (s), 136.0 (s), 134.8 (s), 133.8 (s), 130.2 (s), 129.8 (d), 129.7 (d), 129.2 (d), 128.2 (d), 127.6 (d), 127.0 (d), 119.6 (d), 54.1 (t), 53.5 (t), 21.5 (q), 16.7 (q); IR (neat)  3060, 2921, 2853, 1598, 1471, 1347, 1164, 1099, 1066, 818, 767, 735, 706, 661, 592, 548 cm-1; MS (EI, 70 eV) m/z (rel. Int., %) 363 (20) [M+], 362 (20), 208 (16), 207 (30), 165 (13), 91 (46), 57 (23), 55 (15), 45 (12), 44 (29), 43 (18), 41 (26), 32 (100); Anal. Calcd. for C22H21NO2S: C, 72.70; H, 5.82; N, 3.85. Found: C, 72.47; H, 5.65; N, 3.79.

**Analytical data for *meta*-3a:** colourless powder;mp 129-130 °C; Rf **=** 0.58 (hexanes:AcOEt = 8:2); 1H-NMR (400 MHz; CDCl3) 7.80 (m, *J* = 8.3 Hz, *J* = 1.8 Hz, 2 H), 7.31 - 7.50 (m, 7 H), 7.24 (d, *J* = 0.7 Hz, 1 H), 7.19 (s, 1 H), 4.68 (s, 2 H), 4.59 (s, 2 H). 2.41 (s, 3 H), 2.26 (s, 3 H); 13C**-**NMR (100 MHz; CDCl3) 143.7 (s), 141.7 (s), 140.7 (s), 136.6 (s), 134.3 (s), 133.8 (s), 133.0 (s), 129.8 (d), 128.8 (d), 127.7 (d), 127.6 (d), 127.4 (d), 127.1 (d), 118.6 (d), 54.1 (t), 52.9 (t), 21.5 (q), 18.8 (q); IR (neat) 3032, 2920, 2851, 1599, 1470, 1346, 1164, 1099, 1064, 872, 816, 763, 736, 701, 671, 582, 548 cm-1; MS (EI, 70 eV) m/z (rel. Int., %) 363 (5) [M+], 362 (6), 209 (8), 208 (60), 207 (100), 206 (30), 193 (13), 181 (9), 179 (14), 178 (19), 166 (14), 165 (27), 155 (15), 130 (9).

**Analytical data for *ortho*-3b:** colourless powder; mp 113-114 °C; Rf = 0.45 (hexanes:AcOEt = 8:2); 1H-NMR (400 MHz; CDCl3) 7.78 (d, *J* = 8.1 Hz, 2 H), 7.31 (d, *J* = 8.1 Hz, 2 H), 7.02 (d, *J* = 7.7 Hz, 1 H), 6.92 (d, *J* = 7.7 Hz, 1 H), 4.61 (s, 2 H), 4.57 (s, 2 H), 2.53 (t, *J* = 7.7 Hz, 2 H), 2.40 (s, 3H), 2.13 (s, 3 H), 1.55 (m, *J* = 7.6 Hz, 2 H), 0.93 (t, *J* = 7.3 Hz, 3 H); 13C**-**NMR (100 MHz; CDCl3) 143.5 (s), 140.3 (s), 135.7 (s), 133.8 (s), 133.2 (s), 130.5 (s), 129.8 (d), 128.9 (d), 127.6 (d), 119.5 (d), 54.0 (t), 53.5 (t), 34.9 (t), 23.7 (t), 21.5 (q), 15.2 (q), 14.0 (q); IR (neat) 3054, 2959, 2928, 2871, 2856, 1597, 1452, 1346, 1266, 1164, 1099, 1065, 816, 738, 711, 661, 587, 549 cm-1; MS (EI, 70 eV) m/z (rel. Int., %) 330 (5) [M++1], 329 (10) [M+], 328 (20), 175 (22), 174 (100), 173 (80), 155 (19), 145 (30), 144 (90), 132 (19), 131 (30), 130 (29), 117 (31), 115 (23), 92 (25), 91 (69), 65 (21); Anal. Calcd. for C19H23NO2S: C, 69.27; H, 7.04; N, 4.25. Found: C, 69.39; H, 6.94; N, 4.31.

**Analytical data for *meta*-3b:** colourless powder; mp 93-94 °C; Rf = 0. 43 (hexanes:AcOEt = 8:2); 1H-NMR (400 MHz; CDCl3) 7.77 (d, *J* = 8.2 Hz, 2 H), 7.31 (d, *J* = 8.2 Hz, 2 H), 6.83 (s, 1 H), 6.80 (s, 1 H), 4.60 (s, 2 H), 4.52 (s, 2 H). 2.50 (t, *J* = 7.5 Hz, 2 H), 2.40 (t, 3 H), 2.17 (s, 3 H), 1.43-1.59 (m, 2 H), 0.90 (t, *J* = 7.3 Hz, 3 H); 13C**-**NMR (100 MHz; CDCl3) 143.5 (s), 142.9 (s), 135.9 (s), 133.8 (s), 132.5 (s), 132.3 (s), 129.8 (d), 128.9 (d), 127.6 (d), 119.7 (d), 54.0 (t), 52.9 (t), 37.8 (t), 24.7 (t), 21.5 (q), 18.6 (q), 13.8 (q); IR (neat) 3013, 2959, 2927, 2867, 1598, 1491, 1467, 1347, 1165, 1099, 1065, 1018, 832, 816, 738, 709, 671, 649, 581, 548 cm-1; MS (EI, 70 eV) m/z (rel. Int., %) 329 (14) [M+], 328 (32), 175 (50), 174 (100), 173 (60), 158 (12), 155 (37), 147 (13), 145 (58), 144 (82), 132 (30), 131 (60), 130 (54), 129 (11), 128 (12), 118 (14), 117 (14), 116 (17), 115 (44), 105 (14), 103 (13), 92 (33), 91 (79), 89 (17), 77 (21), 65 (60), 63 (12).

**Analytical data for *ortho*-3c:** colourless powder; mp 127-129 °C; Rf = 0.28 (hexanes:AcOEt = 1:1); 1H-NMR (400 MHz; CDCl3) 7.78 (m, *J* = 8.4 Hz, *J* = 1.7 Hz, 2 H), 7.32 (m, *J* = 8.4 Hz, *J* = 0.7 Hz, 2 H), 7.24 (d, *J* = 7.8 Hz, 1 H), 6.99 (d, *J* = 7.8 Hz, 1 H), 4.66 (s, 2 H), 4.62 (s, 2 H), 4.57 (s, 2 H), 2.40 (s, 3 H), 2.20 (s, 3 H); 13C**-**NMR (100 MHz; CDCl3) 143.7 (s), 138.1 (s), 136.1 (s), 135.5 (s), 129.8 (s), 128.7 (s), 127.9 (d), 127.6 (d), 119.8 (d), 118.4 (d), 63.1 (t), 54.0 (t), 53.2 (t), 21.5 (q), 14.9 (q); IR (neat) 3415, 2920, 2853, 1597, 1453, 1342, 1162, 1098, 1064, 1018, 817, 711, 692, 662, 586, 548 cm-1; MS (EI, 70 eV) m/z (rel. Int., %) 317 (3) [M+], 162 (100), 161 (21), 144 (39), 132 (35), 131 (31), 130 (19), 117 (20), 92 (18), 91 (90), 77 (14), 65 (19).

**Analytical data for *meta*-3c:** colourless powder; mp 165-166 °C; Rf = 0.28 (hexanes:AcOEt = 1:1); 1H-NMR (400 MHz; CDCl3) 7.77 (d, *J* = 8.1 Hz, 2 H), 7.31 (d, *J* = 8.1 Hz, 2 H), 7.02 (s, 1 H), 7.00 (s, 1 H), 4.62 (s, 4 H). 4.54 (s, 2 H), 2.40 (s, 3 H), 2.20 (s, 3 H); 13C**-**NMR (100 MHz; CDCl3) 143.6 (s), 141.1 (s), 136.3 (s), 134.6 (s), 133.9 (s), 132.9 (s), 129.8 (d), 127.6 (d), 127.4 (d), 118.5 (d), 65.0 (t), 54.0 (t), 52.9 (t), 21.5 (q), 18.6 (q); IR (neat) 3394, 2921, 2850, 1597, 1452, 1342, 1162, 1100, 1064, 1018, 832, 817, 711, 672, 579, 546 cm-1; MS (EI, 70 eV) m/z (rel. Int., %) 317 (3) [M+], 163 (16), 162 (100), 161 (27), 160 (12), 155 (15), 146 (11), 144 (55), 143 (11), 132 (56), 131 (46), 130 (29), 117 (35), 115 (10), 105 (19), 103 (13), 92 (20), 91 (92), 89 (12), 77 (19), 65 (42), 63 (11); Anal. Calcd. for C17H19NO3S: C, 64.33; H, 6.03; N, 4.41. Found: C, 64.08; H, 5.86; N, 4.40.

**Analytical data for *ortho*-3d:** *ortho***-3d** was not isolated as single compound. Characteristic 1H and 13C NMR data are as follows:

1H-NMR (400 MHz; CDCl3) 7.77 (m, *J* = 8.3 Hz, 2 H), 7.31 (m, *J* = 8.3 Hz, 2 H), 7.07 (d, *J* = 7.8 Hz, 1 H), 6.94 (d, *J* = 7.8 Hz, 1 H), 4.60 (s, 2 H), 4.56 (s, 2 H), 4.51 (s, 2 H), 3.80 (t, 2 H), 2.86 (t, *J* = 6.8 Hz, 2 H), 2.40 (t, 3 H), 2.17 (s, 3 H); 13C**-**NMR (100 MHz; CDCl3) 143.6 (s), 138.8 (s), 135.8 (s), 133.5 (s), .....119.6 (d), 62.4 (t), 53.9 (t), 53.3 (t), 38.6 (t), 21.3 (q), 15.8 (q);

**Analytical data for *meta*-3d:** colourless needles; mp 127-129 °C; Rf = 0.28 (hexanes:AcOEt = 1:1); 1H-NMR (400 MHz; CDCl3) 7.77 (m, *J* = 8.3 Hz, *J* = 1.9 Hz, 2 H), 7.31 (m, *J* = 8.3 Hz, *J* = 0.8 Hz, 2 H), 6.89 (s, 1 H), 6.86 (s, 1 H), 4.60 (s, 2 H), 4.51 (s, 2 H), 3.80 (t, *J* = 6.5 Hz, 2 H), 2.78 (t, *J* = 6.5 Hz, 2 H), 2.40 (t, 3 H), 2.18 (s, 3 H); 13C**-**NMR (100 MHz; CDCl3) 143.6 (s), 138.8 (s), 136.2 (s), 133.7 (s), 133.4 (s), 132.7 (s), 129.8 (d), 129.3 (d), 127.5 (d), 120.3 (d), 63.5 (t), 53.9 (t), 52.9 (t), 38.8 (t), 21.4 (q), 18.6 (q); IR (neat) 3424, 2922, 2865, 1598, 1468, 1344, 1164, 1099, 1050, 910, 831, 816, 732, 710, 672, 581, 548 cm-1; MS (EI, 70 eV) m/z (rel. Int., %) 331 (12) [M+], 330 (21), 177 (12), 176 (100), 175 (26), 158 (14), 157 (29), 145 (14), 144 (57), 91 (37), 57 (12); Anal. Calcd. for C18H21NO3S: C, 65.23; H, 6.39; N, 4.23. Found: C, 64.79; H, 6.45; N, 4.08.

**Analytical data for *ortho*-5a:** colourless powder; mp 185-186 °C; Rf = 0.31 (hexanes:AcOEt = 1:1); 1H-NMR (400 MHz; CDCl3) 7.69 (m, *J* = 8.2 Hz, *J* =1.9 Hz, 2 H), 7.45 (d, *J* = 8.3 Hz, 1 H), 7.23 (d, *J* = 8.2 Hz, 2 H), 7.16 (d, *J* = 8.3 Hz, 1 H), 4.62 (d, *J* = 4.7 Hz, 2 H), 3.93 (t, *J* = 8.4 Hz, 2 H), 2.86 (t, *J* = 8.4 Hz, 2 H), 2.37 (s, 3 H), 2.16 (s, 3 H); 13C**-**NMR (100 MHz; CDCl3) 144.0 (s), 141.4 (s), 134.0 (s), 133.9 (s), 133.4 (s), 131.2 (s), 129.6 (d), 128.2 (d), 127.3 (d), 111.7 (d), 63.3 (t), 49.9 (t), 26.9 (t), 21.5 (q), 14.9 (q); IR (neat) 3323, 3062, 2921, 1595, 1474, 1452, 1350, 1250, 1164, 1093, 1060, 816, 736, 706, 676, 597, 541 cm-1; MS (EI, 70 eV) m/z (rel. Int., %) 317 (3) [M+], 146 (9), 132 (10), 99 (15), 83 (9), 71 (13), 70 (11), 69 (17), 57 (29), 55 (16), 44 (23), 43 (15), 41 (13), 32 (100); Anal. Calcd. for C17H19NO3S: C, 64.33; H, 6.03; N, 4.41. Found: C, 63.95; H, 5.95; N, 4.58.

**Analytical data for *meta*-5a:** colourless powder; mp 112-113 °C; Rf = 0.4 (hexanes:AcOEt = 1:1); 1H-NMR (400 MHz; CDCl3) 7.68 (m, *J* = 8.3 Hz, *J* = 1.8 Hz, 2 H), 7.46 (s, 1 H), 7.23 (m, *J* = 8.3 Hz, 2 H), 6.83 (s, 1 H), 4.65 (d, *J* = 5.6 Hz, 2 H), 3.92 (t, *J* = 8.5 Hz, 2 H), 2.80 (t, *J* = 8.5 Hz, 2 H), 2.37 (s, 3 H), 2.13 (s, 3 H), 1.81 (t, *J* = 5.6 Hz, 1 H); 13C**-**NMR (100 MHz; CDCl3) 144.0 (s), 142.0 (s), 141.0 (s), 134.7 (s), 134.0 (s), 129.8 (s), 129.6 (d), 127.3 (d), 123.4 (d), 110.8 (d), 65.3 (t), 50.0 (t), 26.4 (t), 21.5 (q), 18.6 (q); IR (neat) 3398, 2919, 1739, 1712, 1598, 1446, 1422, 1351, 1266, 1228, 1164, 1094, 860, 814, 749, 707, 669, 587, 545 cm-1; MS (EI, 70 eV) m/z (rel. Int., %) 318 (11) [M++1], 317 (60) [M+], 162 (41), 144 (36), 135 (17), 133 (12), 132 (100), 130 (12), 117 (27), 91 (35), 65 (9), 49 (8), 32 (21); Anal. Calcd. for C17H19NO3S: C, 64.33; H, 6.03; N, 4.41. Found: C, 64.16; H, 6.05; N, 4.26.

**Analytical data for *ortho*-5b:** colourless powder; mp 109-110 °C; Rf = 0.27 (hexanes:AcOEt = 1:1); 1H-NMR (400 MHz; CDCl3) 7.69 (d, *J* = 8.4 Hz, 2 H), 7.42 (d, *J* = 8.1 Hz, 1 H), 7.23 (d, *J* = 8.4 Hz, 2 H), 7.01 (d, *J* = 8.1 Hz, 1 H), 3.91 (t, *J* = 8.4 Hz, 2 H), 3.77 (t, *J* = 6.8 Hz, 2 H), 2.81-2.86 (m, 4 H), 2.37 (s, 3 H), 2.10 (s, 3 H); 13C**-**NMR (100 MHz; CDCl3) 143.9 (s), 140.3 (s), 134.1 (s), 133.2 (s), 131.7 (s), 131.2 (s), 129.6 (d), 129.3 (d), 127.4 (d), 112.1 (d), 62.8 (t), 49.8 (t), 35.8 (t), 27.3 (t), 21.5 (q), 15.4 (q); IR (neat) 3347, 2923, 2875, 1596, 1476, 1452, 1351, 1253, 1165, 1094, 1041, 816, 735, 707, 677, 644, 597, 576, 543 cm-1; MS (EI, 70 eV) m/z (rel. Int., %) 332 (7) [M++1], 331 (35) [M+], 300 (52), 176 (44), 159 (18), 158 (100), 144 (40), 143 (52), 103 (14), 91 (83), 89 (17), 77 (18), 65 (45).

**Analytical data for *meta*-5b:** colourless needles; mp 129-130 °C; Rf = 0.39 (hexanes:AcOEt = 1:1); 1H-NMR (400 MHz; CDCl3) 7.70 (m, *J* = 8.3 Hz, *J* = 1.8 Hz, 2 H), 7.35 (s, 1 H), 7.22 (d, *J* = 8.3 Hz, 2 H), 6.66 (s, 1 H), 3.92 (t, *J* = 8.4 Hz, 2 H), 3.85 (t, *J* = 6.4 Hz, 2 H), 2.76-2.85 (m, 4 H), 2.36 (s, 3 H), 2.11 (s, 3 H); 13C**-**NMR (100 MHz; CDCl3) 144.0 (s), 142.0 (s), 138.4 (s), 134.5 (s), 133.9 (s), 129.6 (d), 128.6 (s), 127.3 (d), 125.5 (d), 112.6 (d), 63.8 (t), 50.0 (t), 39.2 (t), 26.3 (t), 21.5 (q), 18.6 (q); IR (neat) 3416, 2922, 1598, 1446, 1352, 1164, 1094, 1045, 814, 707, 668, 588, 546 cm-1; MS (EI, 70 eV) m/z (rel. Int., %) 332 (20) [M++1], 331 (100) [M+], 177 (12), 176 (83), 158 (79), 144 (20), 143 (16), 130 (9), 119 (9), 118 (10), 117 (9), 91 (18); Anal. Calcd. for C18H21NO3S: C, 65.23; H, 6.39; N, 4.23. Found: C, 64.97; H, 6.39; N, 4.37.

**Analytical data for *ortho*-5c:** colourless powder; mp 114-115°C; Rf = 0.31 (hexanes:AcOEt = 1:1); 1H-NMR (400 MHz; CDCl3) 7.68 (m, *J* = 8.3 Hz, *J* = 1.8 Hz, 2 H), 7.40 (d, *J* = 8.2 Hz, 1 H), 7.22 (m, *J* = 8.3 Hz, 2 H), 6.99 (d, *J* = 8.2 Hz, 1 H), 3.90 (t, *J* = 8.4 Hz, 2 H), 3.68 (t, *J* = 6.6 Hz, 2 H), 2.81 (t, *J* = 8.4 Hz, 2 H), 2.63 (m, *J* = 6.9 Hz, 2 H), 2.37 (s, 3 H), 2.08 (s, 3 H), 1.75-1.82 (m, 2 H); IR (neat) 3383, 2934, 2871, 1597, 1475, 1351, 1253, 1165, 1094, 1059, 913, 815, 707, 677, 644, 594, 573, 544 cm-1; MS (EI, 70 eV) m/z (rel. Int., %) 345 (11) [M+], 190 (18), 176 (16), 172 (13), 157 (14), 145 (16), 144 (100), 143 (13), 135 (12), 132 (12), 131 (26), 130 (36), 119 (12), 117 (25), 115 (16), 92 (12), 91 (90), 65 (22), 41 (14), 31 (10).

**Analytical data for *meta*-5c:** colourless needles; mp 114-115°C; Rf = 0.42 (hexanes:AcOEt = 1:1); 1H-NMR (400 MHz; CDCl3) 7.68 (m, *J*= 8.3 Hz, *J* = 1.8 Hz, 2 H), 7.34 (s, 1 H), 7.22 (m, *J* = 8.3 Hz, *J* = 0.5 Hz, 2 H), 6.64 (d, *J* = 0.5 Hz, 1 H), 3.91 (t, *J* = 8.4 Hz, 2 H), 3.67 (t, *J* = 6.5 Hz, 2 H), 2.76 (t, *J* = 8.4 Hz, 2 H), 2.67 (t, *J* = 7.7 Hz, 2 H), 2.36 (s, 3 H), 2.09 (s, 3 H), 1.85-1.92 (m, 2 H); 13C**-**NMR (100 MHz; CDCl3) 143.9 (s), 141.9 (s), 141.8 (s), 134.3 (s), 134.0 (s), 129.6 (d), 128.0 (s), 127.3 (d), 124.9 (d), 112.3 (d), 62.2 (t), 50.0 (t), 34.5 (t), 32.1 (t), 26.3 (t), 21.5 (q), 18.6 (q); IR (neat) 3391, 2936, 1597, 1489, 1448, 1352, 1164, 1094, 1060, 814, 707, 668, 588, 546 cm-1; MS (EI, 70 eV) m/z (rel. Int., %) 346 (22) [M++1], 345 (100) [M+], 331 (42), 301 (22), 191 (12), 290 (89), 176 (29), 175 (11), 158 (32), 146 (24), 145 (16), 144 (43), 143 (10), 131 (17), 130 (15), 119 (16), 117 (14), 91 (24), 32 (11); Anal. Calcd. for C19H23NO3S: C, 66.06; H, 6.71; N, 4.05. Found: C, 65.74; H, 6.62; N, 4.14.

**Analytical data for *ortho*-5d:** colourless powder; mp 156-158 °C; Rf = 0.5 (hexanes:AcOEt = 1:1); 1H-NMR (400 MHz; CDCl3) 7.72 (m, *J* = 8.3 Hz, *J* = 1.6 Hz, 2 H), 7.63 (d, *J* = 8.3 Hz, 1 H), 7.33-7.40 (m, 5 H), 7.26 (d, *J* = 8.3 Hz, *J* = 0.5 Hz, 2 H), 7.12-7.15 (m, 2 H), 4.39 (s, 2 H), 3.85 (t, *J* = 8.4 Hz, 2 H), 2.63 (t, *J* = 8.4 Hz, 2 H), 2.40 (s, 3 H); 13C**-**NMR (100 MHz; CDCl3) 144.1 (s), 141.4 (s), 138.6 (s), 137.8 (s), 134.0 (s), 133.9 (s), 130.9 (s), 129.7 (d), 128.6 (d), 128.5 (d), 128.4 (d), 127.6 (d), 127.4 (d), 113.7 (d), 62.8 (t), 50.0 (t), 27.4 (t), 21.6 (q); IR (neat) 3394, 2922, 1597, 1464, 1352, 1253, 1166, 1107, 1089, 1059, 984, 813, 767, 735, 706, 680, 655, 598, 561 cm-1; MS (EI, 70 eV) m/z (rel. Int., %) 380 (17) [M++1], 379 (69) [M+], 207 (17), 206 (100), 194 (36), 178 (15), 165 (14); Anal. Calcd. for C22H21NO3S: C, 69.63; H, 5.58; N, 3.69. Found: C, 69.23; H, 5.32; N, 3.97;

**Analytical data for *meta*-5d:** colourless powder; mp 60-62 °C; Rf = 0.47 (hexanes:AcOEt = 1:1); 1H-NMR (400 MHz; CDCl3) 7.72 (m, *J* = 8.4 Hz, *J* = 1.8 Hz, 2 H), 7.64 (s, 1 H), 7.25-7.38 (m, 8 H), 7.08 (d, *J* = 1.3 Hz, 1 H), 4.74 (s, 2 H), 3.91 (t, *J* = 8.2 Hz, 2 H), 2.93 (t, *J* = 8.2 Hz, 2 H), 2.39 (s, 3 H); 13C**-**NMR (100 MHz; CDCl3) 144.1 (s), 142.7 (s), 141.5 (s), 139.8 (s), 139.0 (s), 134.0 (s), 129.7 (d), 128.8 (s), 128.4 (d), 128.1 (d), 127.40 (d), 127.36 (d), 122.9 (d), 112.2 (d), 65.2 (t), 50.3 (t), 27.5 (t), 21.5 (q); IR (neat) 3415, 2922, 1595, 1416, 1352, 1236, 1165, 1107, 1032, 863, 814, 736, 703, 670, 594, 544 cm-1; MS (EI, 70 eV) m/z (rel. Int., %) 380 (19) [M++1], 379 (77) [M+], 224 (14), 206 (39), 196 (16), 194 (100), 193 (10), 167 (13), 166 (23), 165 (28), 91 (14), 32 (13); Anal. Calcd. for C22H21NO3S: C, 69.63; H, 5.58; N, 3.69. Found: C, 69.39; H, 5.71; N, 3.50;

**Analytical data for *ortho*-5e:** colourless powder; mp 124-125°C; Rf = 0.41 (hexanes:AcOEt = 1:1); 1H-NMR (400 MHz; CDCl3) 7.67 (m, *J* = 8.6 Hz, *J* = 2.0 Hz, 2 H), 7.39 (d, *J* = 8.3 Hz, 1 H), 7.21 (m, *J* = 8.6 Hz, *J* = 0.8 Hz, 2 H), 6.96 (d, *J* = 8.3 Hz, 1 H), 3.90 (t, *J* = 8.3 Hz, 2 H), 2.80 (t, *J* = 8.3 Hz, 2 H), 2.50 (t, *J* = 7.7 Hz, 2H), 2.36 (s, 3 H), 2.06 (s, 3 H), 1.57-1.48 (m, 2H), 0.94 (t, *J* = 7.3 Hz, 3 H); 13C**-**NMR (100 MHz; CDCl3) 143.8 (s), 139.5 (s), 136.3 (s), 134.1 (s), 132.5 (s), 130.9 (s), 129.5 (d), 128.5 (d), 127.4 (d), 112.0 (d), 49.8 (t), 34.9 (t), 27.3 (t), 23.7 (t), 21.5 (q), 15.2 (q), 14.0 (q); IR (neat) 2958, 2929, 2870, 1597, 1475, 1354, 1253, 1166, 1094, 1031, 922, 814, 738, 707, 677, 644, 593, 546 cm-1; MS (EI, 70 eV) m/z (rel. Int., %) 330 (13) [M++1], 329 (64) [M+], 300 (20), 175 (13), 174 (100), 155 (13), 144 (20), 132 (87), 130 (19), 119 (13), 117 (18), 99 (86), 91 (23), 57 (32), 41 (18), 32 (50); Anal. Calcd. for C19H23NO2S: C, 69.27; H, 7.04; N, 4.25. Found: C, 69.41; H, 7.04; N, 4.20.

**Analytical data for *meta*-5e:** colourless powder; mp 92-93°C; Rf = 0.43 (hexanes:AcOEt = 1:1); 1H-NMR (400 MHz; CDCl3) 7.68 (m, *J* = 8.4 Hz, 2 H), 7.32 (s, 1 H), 7.21 (m, *J* = 8.4 Hz, 2 H), 6.61 (s, 1 H), 3.91 (m, *J* = 8.4 Hz, 2 H), 2.76 (t, *J* = 8.4 Hz, 2 H), 2.55 (t, *J* = 7.5 Hz, 2 H), 2.36 (s, 3 H), 2.10 (s, 3 H), 1.57-1.68 (m, 2 H), 0.94 (t, *J* = 7.5 Hz, 3 H); 13C**-**NMR (100 MHz; CDCl3) 143.8 (s), 142.8 (s), 141.7 (s), 134.1 (s), 134.0 (s), 129.5 (d), 127.7 (s), 127.3 (d), 124.9 (d), 112.4 (d), 50.0 (t), 38.1 (t), 26.3 (t), 24.9 (t), 21.5 (q), 18.6 (q), 13.8 (q); IR (neat) 2958, 2927, 2869, 1598, 1489, 1447, 1421, 1354, 1268, 1228, 1165, 1095, 988, 959, 848, 813, 738, 707, 668, 610, 588, 546 cm-1; MS (EI, 70 eV) m/z (rel. Int., %) 330 (11) [M++1], 329 (50) [M+],175 (15), 174 (82), 147 (20), 144 (25), 133 (15), 132 (100), 130 (29), 119 (14), 118 (19), 117 (40), 115 (17), 105 (21), 103 (9), 91 (60), 77 (12), 65 (21).

**Typical procedure for the synthesis of 1-alkynylamides.** KHMDS (4.1 mmol, 8.2 ml of a 0.5 M solution in toluene) was added to a solution of **C** (0.93 g, 3.92 mmol) in absolute toluene (150 ml) under argon at 0°C. The mixture was allowed to warm to room temperature and the alkynyl iodonium salt **D** (2.4 g, 5.3 mmol) was added in small portions. The reaction mixture was stirred for 12 h and then filtered through a plug of silica gel. Purification by column chromatography (silica gel, hexanes:diethyl ether = 9:1 (v/v)) gave analytically pure **E** (1.0 g, 3.0 mmol, 77%) as a colourless powder.

**Analytical data for E:** colourless powder; mp 72-73°C; Rf = 0.63 (hexanes:AcOEt = 8:2); 1H-NMR (200 MHz; CDCl3) 7.79 (m, *J*= 8.3 Hz, *J* = 1.7 Hz, 2 H), 7.33 (m, *J* = 8.3 Hz, 2 H), 3.43 (t, *J* = 8.4 Hz, 2 H), 2.40-2.49 (m, 5 H),0.15 (s, 9 H); 13C**-**NMR (50 MHz; CDCl3) 144.6 (s), 134.6 (s), 129.6 (d), 127.7 (d), 94.5 (s), 77.9 (s), 74.5 (s), 73.5 (s), 50.4 (t), 21.6 (q), 18.5 (t), 3.4 (q); IR (neat) 2959, 2922, 2159, 1597, 1449, 1371, 1250, 1171, 1092, 1019, 982, 846, 815, 760, 713, 661, 588, 568, 544 cm-1; MS (EI, 70 eV) m/z (rel. Int., %) 334 (10) [M++1], 333 (35) [M+], 318 (20), 280 (25), 269 (9), 254 (11), 216 (12), 181 (13), 180 (14), 179 (22), 178 (83), 155 (43), 152 (10), 150 (9), 149 (34), 139 (45), 135 (18), 124 (12), 123 (15), 111 (29), 110 (49), 98 (10), 97 (22), 92 (13), 91 (100), 83 (27), 75 (38), 67 (50), 65 (80), 59 (30), 53 (18). Anal. Calcd. for C17H23NO2SSi: C, 61.22; H, 6.95; N, 4.20. Found: C, 60.94; H, 6.94; N, 4.12.

**Typical procedure for the synthesis of 4:** TBAF (4 mmol, 4 ml of a 1 M solution in THF) was added to a solution of **E** (1.15g, 3.45mmol) in aqueous deoxygenated THF (80 ml). The mixture was stirred for 5 minutes at 0°C. After washing with diethyl ether / brine, the organic layer was dried with MgSO4. Purification by column chromatography (silica gel, hexanes:diethyl ether = 8:2 (v/v)) gave analytically pure **4a** (0.78 g, 2.99 mmol, 87%) as colourless plates.

**Analytical data for 4a:** colourless plates; mp 93-94°C; Rf = 0.43 (hexanes:AcOEt = 8:2); 1H-NMR (400 MHz; CDCl3) 7.81 (m, *J* = 8.3 Hz, *J* = 1.7 Hz, 2 H), 7.35 (d, *J* = 8.3 Hz, 2 H), 3.45 (m, 2 H), 2.76 (s, 1 H), 2.43-2.49 (m, 5 H), 1.73 (t, *J* = 2.5 Hz, 3 H); 13C**-**NMR (100 MHz; CDCl3) 144.8 (s), 134.6 (s), 129.8 (d), 127.6 (d), 78.0 (s), 75.5 (s), 74.3 (s), 59.4 (d), 50.2 (t), 21.6 (q), 18.4 (t), 3.4 (s); IR (neat) 3274, 3063, 2926, 2849, 2142, 1596, 1492, 1435, 1360, 1316, 1244, 1186, 1169, 1092, 1017, 962, 808, 709, 696, 650, 579, 543 cm-1; MS (EI, 70 eV) m/z (rel. Int., %) 261 (2) [M+], 259 (12), 257 (11), 155 (20), 106 (88), 92 (10), 77 (8), 67 (21), 65 (28), 58 (10), 53 (11), 44 (9), 41 (33), 39 (12), 32 (85); Anal. Calcd. for C14H15NO2S: C, 64.34; H, 5.79; N, 5.36. Found: C, 64.30; H, 5.62; N, 5.38.

**Synthesis of 1.** To a solution of sulfonamide **F** (0.5 g, 2.39 mmol) in dimethylformamide (DMF) (25 ml) was added NaH (95%, 0.06 g, 2.5 mmol) at 0°C. After stirring 0.5h at room temperature, 1-brom-2-butyne (0.33 g, 2.48 mmol) was added. The reaction mixture was stirred for 10 h and quenched by the addition of brine / diethyl ether. The organic layer was dried over MgSO4, concentrated, and chromatographed (silica gel, hexanes:diethyl ether=8:2 (v/v)) to give **1** (0.35 g, 1.34 mmol, 56%).

**Analytical data for 1:** colourless plates; mp 65-66°C; Rf = 0.31 (hexanes:AcOEt = 8:2); 1H-NMR (400 MHz; CDCl3) 7.71 (m, *J* = 8.4 Hz, 2 H), 7.29 (d, *J* = 8.4 Hz, 2 H), 4.14 (d, *J* = 2.4 Hz, 2 H), 4.10 (q, *J* = 2.4 Hz, 2 H), 2.13 (s, 3 H), 1.64 (t, *J* = 2.4 Hz, 3 H); 13C**-**NMR (100 MHz; CDCl3) 143.6 (s), 135.3 (s), 129.3 (d), 127.8 (d), 81.87 (s), 76.44 (s), 73.59 (s), 71.19 (d), 36.60 (t), 36.02 (t); 21.43 (q); IR (neat) 3300, 2974, 2932, 2311, 2226, 1932, 1816, 1664, 1594, 1494, 1444, 1367, 1344, 1331, 1254, 1160, 1117, 1092, 1073, 950, 897, 821, 751, 658, 594, 570, 541 cm-1; MS (EI, 70 eV) m/z (rel. Int., %) 261 (3) [M+], 196 (15), 182 (15), 176 (20), 155 (30), 147 (75), 139 (19), 133 (43), 106 (67), 105 (30), 99 (71), 92 (17), 91 (100), 89 (11), 79 (16), 78 (21), 77 (39), 65 (30), 57 (30), 55 (13), 53 (19), 51 (15), 44 (10), 41 (24), 39 (28), 32 (30); Anal. Calcd. for C14H15NO2S: C, 64.34; H, 5.79; N, 5.36. Found: C, 64.24; H, 5.96; N, 5.35.
